# Supplementary material
Source: Springer Nature journal article supplement (https://www.springermedizin.de/resource/supplementary/12911_2011_506_MOESM2_ESM.pdf/9525970)

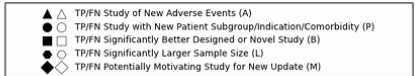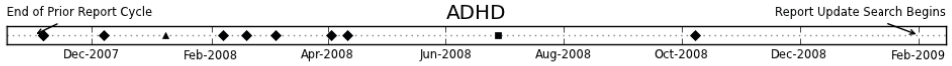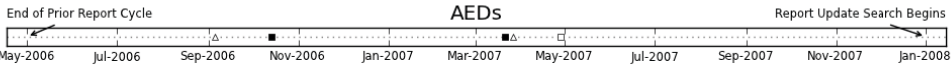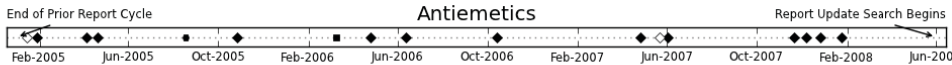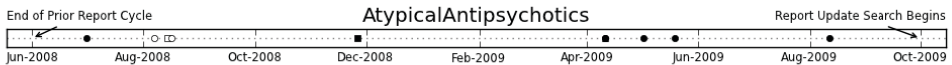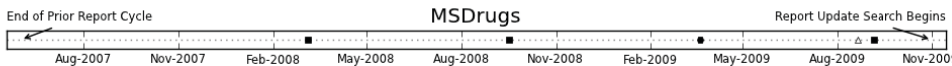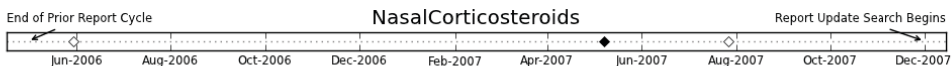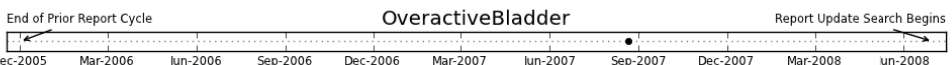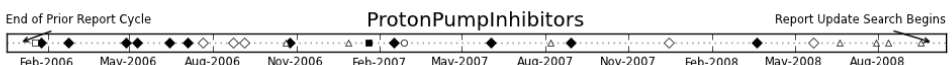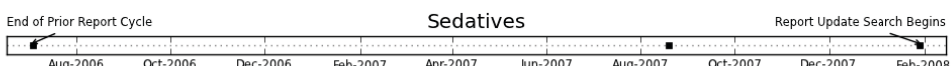

Supplement: MOESM2 [file 9525970]
